# Supplementary material
Source: HighWire-hosted journal article supplement (https://jnm.snmjournals.org/highwire/filestream/95374/field_highwire_adjunct_files/0/206490_Supplemental_Data.pdf)
Supplement: 206490_Supplemental_Data.pdf [file 206490_Supplemental_Data.pdf]

**Supplemental Table 1.** Overview of anatomical regions for evaluation of repeatability

| Bone lesion site legend                                                                                                                                                                                      | Lymph node site legend                                                                 | Soft tissue lesion site legend                                                                                                                                                  |
|--------------------------------------------------------------------------------------------------------------------------------------------------------------------------------------------------------------|----------------------------------------------------------------------------------------|---------------------------------------------------------------------------------------------------------------------------------------------------------------------------------|
| 1=Skull<br>2=Cervical spine<br>3=Thoracic spine<br>4=Lumbar spine<br>5=Sacrum/coccyx<br>6=Ilium/ischium/pubis<br>7=Sternum<br>8=Clavicles/scapulae<br>9=Ribs<br>10=Upper extremities<br>11=Lower extremities | 1-8= Pelvic nodes (see diagram)<br>9=Other upper abdominal<br>10= Thoracic<br>11= Neck | 1=Brain<br>2=Lung<br>3=Pleura<br>4=Liver<br>5=Spleen<br>6=Pancreas<br>7=Adrenal<br>8=Kidney<br>9=Soft tissues of the neck/chest/<br>abdomen/pelvis<br>10=Other (please specify) |

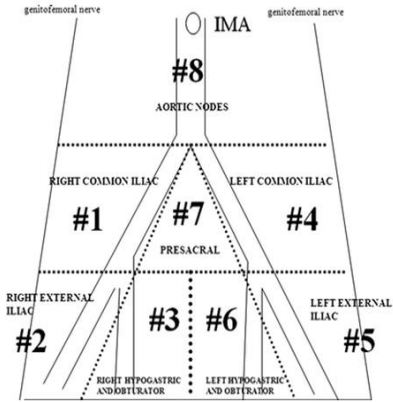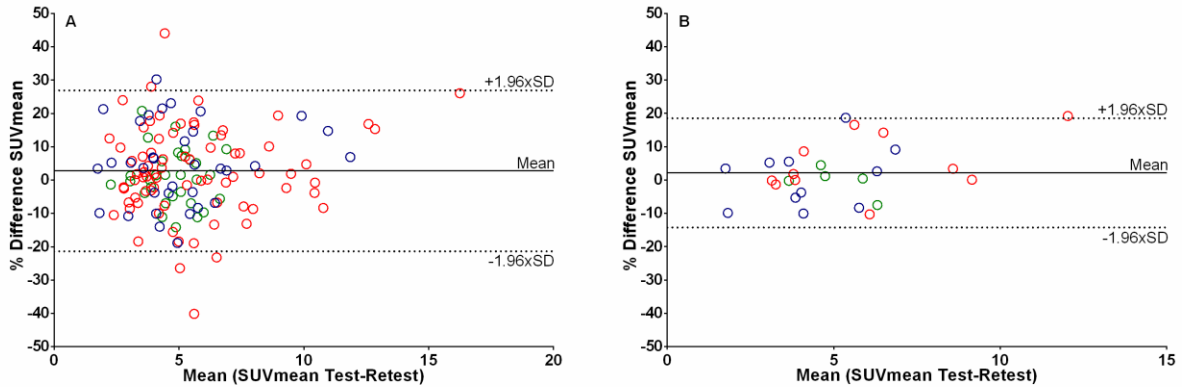

**Supplemental Figure 1.** Bland–Altman plots showing repeatability of  $SUV_{mean}$  on lesion (A) and patient (B) level. (Blue: Center 1; Red: Center 2; Green: Center 3)
